# Supplementary material for: Clinical Validation of a Rapid Variant-Proof RT-RPA Assay for the Detection of SARS-CoV-2
Source: MDPI journal article supplement (doi:10.3390/diagnostics12051263), 2022-05-19
Supplement: s1 [file s1]

## Supplementary Information

### **Clinical validation of a rapid variant-proof RT-RPA assay for the detection of SARS-CoV-2**

Dounia Cherkaoui<sup>1,2,a</sup>, Judith Heaney<sup>3,a</sup>, Da Huang<sup>1</sup>, Matthew Byott<sup>3,4</sup>, Benjamin S. Miller<sup>1</sup>, Eleni Nastouli<sup>3,4,\*</sup> & Rachel A. McKendry<sup>1,2,\*</sup>

<sup>1</sup> London Centre for Nanotechnology, University College London, London WC1E 6BT, UK.

<sup>2</sup> Division of Medicine, University College London, London WC1E 6BT, UK.

<sup>3</sup> Advanced Pathogen Diagnostics Unit, University College London Hospitals (UCLH) NHS Trust, London NW1 2BU, UK.

<sup>4</sup> Infection, Immunity and Inflammation Department, Great Ormond Street Institute for Child Health (ICH), UCL, London WC1N 1EH, UK.

<sup>a</sup> These authors contributed equally to this work

\* Corresponding authors: [r.a.mckendry@ucl.ac.uk](mailto:r.a.mckendry@ucl.ac.uk), [e.nastouli@ucl.ac.uk](mailto:e.nastouli@ucl.ac.uk)

**Supplementary Table S1. Clinical validation panel (91 clinical samples)**

| Samples | Pathogen(s) | Lineage    | Cq   | RT-RPA result        | TT<br>E RdRP (sec) | Comparative<br>result |
|---------|-------------|------------|------|----------------------|--------------------|-----------------------|
| 1       | SARS-CoV-2  | B.1.1.7    | 31.1 | Positive             | 655 689            | TP                    |
| 2       | SARS-CoV-2  | B.1.1.7    | 20.1 | Positive             | 417 450            | TP                    |
| 3       | Flu A       |            |      | Negative             |                    | TN                    |
| 4       | SARS-CoV-2  | B.1.1.216  | 30.0 | Positive             | 417 450            | TP                    |
| 5       | SARS-CoV-2  | B.1.1.7    | 32.0 | Negative             |                    | FN                    |
| 6       | SARS-CoV-2  | B.1.1.7    | 30.0 | Positive             | 554 588            | TP                    |
| 7       | SARS-CoV-2  | B.1.1.7    | 31.0 | Positive             | 588 621            | TP                    |
| 8       | SARS-CoV-2  | B.1.1.7    | 22.2 | Positive             | 417 450            | TP                    |
| 9       | RSV         |            |      | Negative             |                    | TN                    |
| 10      | RSV         |            |      | Negative             |                    | TN                    |
| 11      | Enterovirus |            |      | Negative             |                    | TN                    |
| 12      | RSV         |            |      | Negative             |                    | TN                    |
| 13      | SARS-CoV-2  | B.1.1.307  | 27.3 | Positive             | 485 554            | TP                    |
| 14      | SARS-CoV-2  | B.1.177.18 | 29.6 | Presumptive positive | 1065 X             | TP                    |
| 15      | SARS-CoV-2  | B.1.1.7    | 25.0 | Positive             | 450 519            | TP                    |
| 16      | HCoV-NL63   |            |      | Positive             | 822 890            | FP                    |
| 17      | SARS-CoV-2  | B.1.1.311  | 32.0 | Positive             | 855 890            | TP                    |
| 18      | HCoV-HKU1   |            |      | Negative             |                    | TN                    |
| 19      | SARS-CoV-2  | B.1.1.7    | 24.4 | Positive             | 413 446            | TP                    |
| 20      | Flu A       |            |      | Negative             |                    | TN                    |
| 21      | Flu A       |            |      | Negative             |                    | TN                    |
| 22      | SARS-CoV-2  | B.1.1.7    | 37.3 | Negative             |                    | FN                    |
| 23      | Flu B       |            |      | Negative             |                    | TN                    |
| 24      | Flu B       |            |      | Negative             |                    | TN                    |
| 25      | Flu A       |            |      | Negative             |                    | TN                    |
| 26      | Rhinovirus  |            |      | Negative             |                    | TN                    |
| 27      | HCoV-229E   |            |      | Negative             |                    | TN                    |
| 28      | Flu A       |            |      | Negative             |                    | TN                    |
| 29      | Flu A       |            |      | Negative             |                    | TN                    |
| 30      | SARS-CoV-2  | B.1.1.7    | 24.3 | Positive             | 480 514            | TP                    |
| 31      | SARS-CoV-2  | B.1.177.6  | 33.0 | Positive             | 406 438            | TP                    |
| 32      | SARS-CoV-2  | B.1.1.7    | 23.8 | Positive             | 406 438            | TP                    |
| 33      | HCoV-OC43   |            |      | Negative             |                    | TN                    |
| 34      | Flu B       |            |      | Negative             |                    | TN                    |
| 35      | SARS-CoV-2  | B.1.1.7    | 33.9 | Positive             | 624 654            | TP                    |
| 36      | SARS-CoV-2  | B.1.1.216  | 31.3 | Positive             | 438 468            | TP                    |
| 37      | Flu A       |            |      | Negative             |                    | TN                    |
| 38      | Flu A       |            |      | Negative             |                    | TN                    |

|    |                                    |           |      |                      |          |    |
|----|------------------------------------|-----------|------|----------------------|----------|----|
| 39 | SARS-CoV-2                         | B.1.177   | 24.9 | Positive             | 1088 872 | TP |
| 40 | SARS-CoV-2                         | B.1.177   | 20.7 | Positive             | 375 406  | TP |
| 41 | SARS-CoV-2                         | B.1.177   | 21.4 | Positive             | 345 375  | TP |
| 42 | SARS-CoV-2                         | B.1.1.7   | 21.8 | Positive             | 468 499  | TP |
| 43 | SARS-CoV-2                         | B.1.1.29  | 35.0 | Positive             | 685 717  | TP |
| 44 | SARS-CoV-2                         | B.1.351   | 29.6 | Positive             | 450 655  | TP |
| 45 | SARS-CoV-2                         | B.1.617.2 | 16.1 | Positive             | 214 272  | TP |
| 46 | SARS-CoV-2                         | B.1.617.2 | 24.2 | Positive             | 714 596  | TP |
| 47 | SARS-CoV-2                         | B.1.1.7   | 28.9 | Positive             | 508 567  | TP |
| 48 | Flu A                              |           |      | Negative             |          | TN |
| 49 | SARS-CoV-2                         | B.1.1.529 | 24.5 | Positive             | 508 508  | TP |
| 50 | SARS-CoV-2                         | B.1.617.2 | 29.3 | Positive             | 450 479  | TP |
| 51 | SARS-CoV-2                         | B.1.617.2 | 27.9 | Positive             | 802 714  | TP |
| 52 | SARS-CoV-2                         | B.1.1.529 | 22.7 | Positive             | 390 450  | TP |
| 53 | Flu A                              |           |      | Negative             |          | TN |
| 54 | SARS-CoV-2                         | B.1.1.529 | 24.5 | Positive             | 390 450  | TP |
| 55 | SARS-CoV-2                         | B.1.351   | 24.4 | Positive             | 567 538  | TP |
| 56 | RSV,<br>Adenovirus,<br>Enterovirus |           |      | Negative             |          | TN |
| 57 | RSV                                |           |      | Negative             |          | TN |
| 58 | SARS-CoV-2                         | B.1.617.2 | 27.5 | Positive             | 532 532  | TP |
| 59 | SARS-CoV-2                         | B.1.617.2 | 30.4 | Positive             | 503 532  | TP |
| 60 | SARS-CoV-2                         | B.1.351   | 26.8 | Positive             | 768 798  | TP |
| 61 | SARS-CoV-2                         | B.1.1.529 | 27.1 | Positive             | 445 503  | TP |
| 62 | Rhinovirus                         |           |      | Negative             |          | TN |
| 63 | Rhinovirus,<br>Enterovirus         |           |      | Negative             |          | TN |
| 64 | SARS-CoV-2                         | B.1.1.529 | 30.7 | Positive             | 621 679  | TP |
| 65 | SARS-CoV-2                         | B.1.1.529 | 22.1 | Positive             | 327 415  | TP |
| 66 | Flu A                              |           |      | Presumptive positive | 768 X    | TN |
| 67 | SARS-CoV-2                         | B.1.177   | 29.7 | Positive             | 269 494  | TP |
| 68 | SARS-CoV-2                         | B.1.617.2 | 16.3 | Positive             | 397 397  | TP |
| 69 | SARS-CoV-2                         | B.1.617.2 | 19.2 | Positive             | 397 430  | TP |
| 70 | SARS-CoV-2                         | B.1.617.2 | 23.3 | Positive             | 430 463  | TP |
| 71 | SARS-CoV-2                         | B.1.617.2 | 21.1 | Positive             | 430 430  | TP |
| 72 | SARS-CoV-2                         | B.1.1.529 | 30.3 | Positive             | 624 655  | TP |
| 73 | RSV                                |           |      | Negative             |          | TN |
| 74 | RSV                                |           |      | Negative             |          | TN |
| 75 | SARS-CoV-2                         | B.1.617.2 | 17.5 | Positive             | 397 463  | TP |
| 76 | HCoV                               |           |      | Presumptive positive | 494 X    | TN |
| 77 | RSV                                |           |      | Negative             |          | TN |
| 78 | SARS-CoV-2                         | B.1.1.529 | 31.3 | Positive             | 494 559  | TP |

|    |            |           |      |                      |         |    |
|----|------------|-----------|------|----------------------|---------|----|
| 79 | Flu A      |           |      | Negative             |         | TN |
| 80 | SARS-CoV-2 | B.1.1.529 | 31.4 | Positive             | 909 998 | TP |
| 81 | SARS-CoV-2 | B.1.617.2 | 13.6 | Positive             | 384 442 | TP |
| 82 | SARS-CoV-2 | B.1.177   | 28.8 | Presumptive positive | X 851   | TP |
| 83 | Rhinovirus |           |      | Negative             |         | TN |
| 84 | SARS-CoV-2 | B.1.1.294 | 33.0 | Positive             | 822 793 | TP |
| 85 | RSV        |           |      | Negative             |         | TN |
| 86 | SARS-CoV-2 | B.1.617.2 | 16.7 | Positive             | 471 471 | TP |
| 87 | Flu A      |           |      | Negative             |         | TN |
| 88 | SARS-CoV-2 | B.1.1.7   | 34.9 | Positive             | 822 822 | TP |
| 89 | HCoV       |           |      | Negative             |         | TN |
| 90 | SARS-CoV-2 | B.1.1.529 | 21.7 | Positive             | 442 471 | TP |
| 91 | SARS-CoV-2 | B.1.617.2 | 29.2 | Positive             | 791 822 | TP |

SARS-CoV-2: severe acute respiratory syndrome coronavirus 2; HCoV: human coronavirus; RSV: respiratory syncytial virus; Flu: influenza; Cq: quantification cycle; TT: time to threshold; X: used instead of TT for a gene that was not detected by RT-RPA; TP: true positive; TN: true negative; FP: false positive; FN: false negative.

**Supplementary Table S2. Confirmation of presumptive positive results by real-time RT-PCR (N1 and E gene)**

| Sample ID | Confirmatory real-time RT-PCR Cq values |
|-----------|-----------------------------------------|
|           | CDC N1 gene                             |
| 14        | 33.22                                   |
| 67        | Undetermined                            |
| 78        | Undetermined                            |
| 84        | 30.092                                  |

**Supplementary Table S3. Correlation between Cq (from RT-PCR N gene) and time to threshold (from RT-RPA E and RdRP gene)**

| Pearson r                   | Cq vs. E gene (FAM) | Cq vs. RdRP gene (HEX) |
|-----------------------------|---------------------|------------------------|
| r                           | 0.511               | 0.629                  |
| 95% confidence interval     | 0.277 to 0.688      | 0.430 to 0.770         |
| R squared                   | 0.261               | 0.396                  |
| P (two-tailed)              | 0.0001              | <0.0001                |
| Significant? (alpha = 0.05) | Yes                 | Yes                    |

### E gene

**E gene forward primer**  
SARS-CoV-2 --TGCTTTCGTGGTATTCTTGCTAGTACACTAGCCATCCTTACTGCGCTTCGATTGTGT  
HCoV-NL63 TGTGTGTTTCGATTATACATGTTGGCTATTATGCCTATCTCTATAAAAAATT---TTTCAT

SARS-CoV-2 GCGTACTGCTGCAATATTGTTAACGTGAGTCTTGTAACCTTCTTTTTACGTTTACTCT  
HCoV-NL63 TTGTTTGTGTT-CAATGTTACTAACTATGCTTCGT-----TTCAGGCA

**E gene exo probe**  
SARS-CoV-2 GGTCTTAAAAATCTGAATTTCTTCTACAGTTCTGATCTTCTGCTCTAAACGAACTAAATA  
HCoV-NL63 AGTGTTGGTATCTTGAA-----CAATCATTT-----TA

**E gene reverse primer**  
SARS-CoV-2 TTATATTAGTTTTCTGTTTGGAACCTTAATTTAGCCATGGCAGATTCCAACGGTACTA  
HCoV-NL63 TGAAATCGTTTTGCTG-----CTATTTATGGTGGTGAC-----CACTA

### RdRP gene

**RdRP gene forward primer**  
SARS-CoV-2 GCTAATGAGTGTGCTCAAGTATTGAGTGAAATGGTCATGTGTGGCGGTTCACTATATGTT  
HCoV-NL63 GGTAAATGAGTTGGCACAAGTTTTTAACAGAAGTTGTTTATTCTAATGGTGGTTTTTATTTT

SARS-CoV-2 AAACCAGGTGGAACCTCATCAGGAGATGCCACAACCTGCTTATGCTAATAGTGTTTTTAAC  
HCoV-NL63 AAGCCAGGTGGTACGACTTCTGGTGACGCTAGTACAGCTTATGCTAATTCTATTTTTAAC

**RdRP gene exo probe**  
SARS-CoV-2 ATTTGTCAAGCTGTACGGCCAATGTTAATG-----CACTTTTATCT  
HCoV-NL63 ATTTTCAAGCCGTGAGTTCTAACATTAAACAGGTTGCTTAGTGTCCCATCAGATTCTATGT

**RdRP gene reverse primer**  
SARS-CoV-2 ACTGATGGTAACAAAATTGCGATAAGTATGTCCGCAATTTACAACACAGACTTTATGAG  
HCoV-NL63 AATAATGTTA-----ATGTTAGGGATCTACAACGACGTCTGTATGAT

## Supplementary Figure S1. Alignment of SARS-CoV-2 and HCoV-NL63 genomes.

Sequence alignment of SARS-CoV-2 (GenBank accession number NC\_045512.2) and HCoV-NL63 (GenBank accession number NC\_005831) genomes using MUSCLE tool (<https://www.ebi.ac.uk/Tools/msa/muscle/>). The percent identity for primers and probes for both E and RdRP genes were calculated: E gene forward primer 40% identity, E gene reverse primer 43% identity, E gene exo probe 31% identity, RdRP gene forward primer 67% identity, RdRP gene reverse primer 43% identity and RdRP gene exo probe 63% identity.

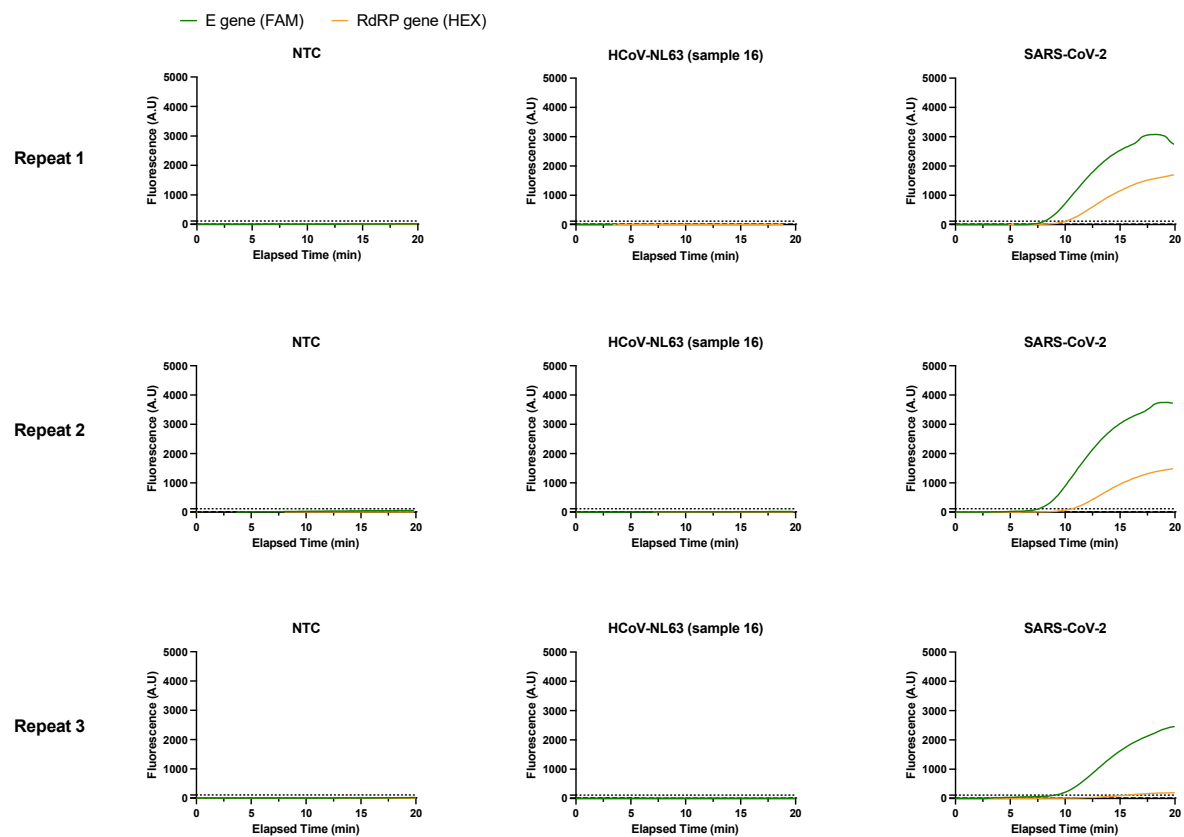

## Supplementary Figure S2. Repeats of HCoV-NL63 (sample 16)

NTC: non-template control; HCoV-NL63: human coronavirus NL63
